# Supplementary material for: A Systematic Review Investigating the Use of Earth Observation for the Assistance of Water, Sanitation and Hygiene in Disaster Response and Recovery
Source: MDPI journal article supplement (doi:10.3390/su15043290), 2023-02-10
Supplement: s1 [file s1]

Figure S1 shows a screenshot of an example search in Publish or Perish, where the search strings were used to identify any potentially relevant literature that contained title words present in the search criteria.

The screenshot displays the Publish or Perish software interface. The main window shows a search for 'water sanitation space' on the Web of Science. The search results table is as follows:

| Search terms                     | Source        | Papers | Cites | Cites/y... | h | g | h,no... | h,ann... | hA | acc... | Search date | Cache date | Las... |
|----------------------------------|---------------|--------|-------|------------|---|---|---------|----------|----|--------|-------------|------------|--------|
| ✓ water sanitation space [title] | Web of Sci... | 3      | 20    | 1.33       | 3 | 3 | 2       | 0.13     | 1  | 0      | 30/08/2021  | 30/08/2021 | 0      |

The sidebar on the left shows the following metrics and filters:

- Publication years: 2006-2019
- Citation years: 15 (2006-2021)
- Papers: 3
- Citations: 20
- Cites/year: 1.33
- Cites/paper: 6.67
- Authors/paper: 2.00
- h-index: 3
- g-index: 3
- h<sub>i</sub>,norm: 2
- h<sub>i</sub>,annual: 0.13
- hA-index: 1
- Papers with ACC >= 1,2,5,10,20: 2,0,0,0,0

The main results table shows the following data:

| Cites  | Per year | Rank | Authors       | Title                                                                                                                        | Year | Publication                   | Publisher        | Type    |
|--------|----------|------|---------------|------------------------------------------------------------------------------------------------------------------------------|------|-------------------------------|------------------|---------|
| ✓ h 5  | 1.25     | 2    | Emmanue...    | Unsafe water, sanitation and hygiene in Nigeria's public spaces: the political economy angle                                 | 2017 | International Journal Of W... | Routledge Jo...  | Article |
| ✓ h 12 | 0.80     | 1    | Helena Kr...  | Household routines - A time-space issue: A theoretical approach applied on the case of water and sanitation                  | 2006 | Applied Geography             | Elsevier Sci Ltd | Article |
| ✓ h 3  | 1.50     | 3    | Jazimoni L... | Food safety policies and practices in public spaces: The urban water, sanitation, and hygiene environment for fresh fish ... | 2019 | Food Science & Nutrition      | Wiley            | Article |

**Figure S1.** Example of literature search in Publish or Perish.
